# Supplementary material
Source: publisher site journal article supplement (https://www.degruyterbrill.com/publication/isbn/9783486842807/downloadAsset/9783486842807_Leseprobe.pdf)
Supplement: Supplementary file 1 [file 9783486842807_Leseprobe.pdf]

# 7 Wichtige Buchungen im Drei-Komponenten-System mit dem NKF-Kontenplan

## 7.1 Eröffnungsbuchungen im Drei-Komponenten-System

Im **Abschnitt 5.1** haben wir die Eröffnungsbuchungen im Zwei-Komponenten System bereits erläutert. Im Drei-Komponenten-System ergeben sich gegenüber dieser Vorgehensweise keine wesentlichen Unterschiede. Zu beachten ist lediglich, dass die Konten Bank und Kasse im doppelischen Buchkreis nicht eröffnet werden, sondern, dass der gesamte Anfangsbestand an Zahlungsmitteln, d.h. der Anfangsbestand an liquiden Mitteln auf das Finanzrechnungskonto eingebucht wird. Diese Vorgehensweise wird nachfolgend gewählt.

Auch andere Buchungsvarianten können akzeptiert werden. So kann man beispielsweise im Buchungskreis das Konto „Liquide Mittel“ einrichten und eröffnen. Dieses Konto wird während des gesamten Haushaltsjahres nicht mehr berührt. Lediglich am Jahresende wird der Saldo des Finanzrechnungskontos auf dem Konto „Liquide Mittel“ gegengebucht und danach das Konto „Liquide Mittel“ zum Schlussbilanzkonto hin abgeschlossen.

Nachfolgend wird anhand eines einfachen Beispiels gezeigt, wie die Eröffnungsbuchungen im Drei-Komponenten-System aussehen.

### Beispiel

Ein kommunaler Verwaltungsbetrieb verfügt über ein Wohngebäude im Werte von 90.000 Euro auf eigenem Grund und Boden im Werte von 10.000 Euro, Rohstoffe im Werte von 50.000 Euro, Gebührenforderungen aus Lieferungen und Leistungen an private Unternehmen im Werte von 80.000 Euro, ein Bankguthaben im Werte von 30.000 Euro und einen Kassenbestand im Werte von 20.000 Euro. Die Allgemeine Rücklage beträgt 200.000 Euro, ein zur Finanzierung des oben genannten Wohngebäudes aufgenommener langfristiger Bankkredit betrage 50.000 Euro und die Verbindlichkeiten aus Lieferungen und Leistungen gegenüber einem inländischen Reinigungsbetrieb betragen 30.000 Euro. Eröffnen Sie bitte die entsprechenden NKF-Konten mit Hilfe eines Eröffnungsbilanzkontos und formulieren Sie die Buchungssätze für die Eröffnungsbuchungen.

- (1) **Grund und Boden bei Wohnbauten (0331)**  
**an**  
**Eröffnungsbilanzkonto (8010) 10.000 Euro**
- (2) **Gebäude, Aufbauten und Betriebsvorrichtungen bei Wohnbauten (0332)**  
**an**  
**Eröffnungsbilanzkonto (8010) 90.000 Euro**
- (3) **Rohstoffe/Fertigungsmaterial (1510)**  
**an**  
**Eröffnungsbilanzkonto(8010) 50.000 Euro**
- (4) **Gebührenforderungen gegenüber dem privaten Bereich (1611)**  
**an**  
**Eröffnungsbilanzkonto (8010) 80.000 Euro**
- (5) **Finanzrechnungskonto (8040)**  
**an**  
**Eröffnungsbilanzkonto (8010) 50.000 Euro**
- (6) **Eröffnungsbilanzkonto (8010)**  
**an**  
**Allgemeine Rücklage (2010) 200.000 Euro.**
- (7) **Eröffnungsbilanzkonto (8010)**  
**an**  
**Investitionskredite von Banken und Kreditinstituten (3251) 50.000 Euro**
- (8) **Eröffnungsbilanzkonto (8010)**  
**an**  
**Verbindlichkeiten aus Lieferungen und Leistungen gegen den privaten Bereich (3550) 30.000 Euro**

Auf der folgenden Seite haben wir die Eröffnungsbuchungen noch einmal mit Hilfe von T-Konten dargestellt:

Mit: Kreditinst. = Kreditinstitute; Verbindl. a. L. u. L. g. d. p. Bereich = Verbindlichkeiten aus Lieferungen und Leistungen gegenüber dem privaten Bereich; W. = Wohnbauten; B. = Betriebsvorrichtungen bei Wohnbauten; Fertig. = Fertigungsmaterial; Gebührenfo. g. d. p. Bereich = Gebührenforderungen gegenüber dem privaten Bereich

| S                                                  | <b>Eröffnungsbilanzkonto 8010</b> |                      |                          |                |                |     | H      |
|----------------------------------------------------|-----------------------------------|----------------------|--------------------------|----------------|----------------|-----|--------|
| (6) Allgemeine Rücklage                            | 200                               |                      |                          |                |                |     | 10 (1) |
| (7) Investitionskredite von Banken und Kreditinst. | 50                                |                      |                          |                |                |     | 90 (2) |
| (8) Verbindl. a. L. u. L. g. d. p. Bereich         | 30                                |                      |                          |                |                |     | 50 (3) |
|                                                    |                                   |                      |                          |                |                |     | 80 (4) |
|                                                    |                                   |                      |                          |                |                |     | 50 (5) |
|                                                    | 280                               |                      |                          |                |                |     | 280    |
| <hr/>                                              |                                   |                      |                          |                |                |     |        |
| <hr/>                                              |                                   |                      |                          |                |                |     |        |
| Einzahlungskonten                                  | Auszahlungskonten                 | Aktivkonten          | Passivkonten             | Aufwandskonten | Ertragsskonten |     |        |
|                                                    |                                   | Grund und Boden      | Allgemeine               |                |                |     |        |
| S H S H                                            | S H                               | S bei W. 0331 H      | S Rücklage 2010 H        | S              | H S            | H S | H H    |
|                                                    |                                   | (1) AB 10            | AB 200 (6)               |                |                |     |        |
|                                                    |                                   | Gebäude, Aufbauten   | Investitionskredite      |                |                |     |        |
| S H S H                                            | S H                               | S und B. 0332 H      | S von Banken 3251 H      | S              | H S            | H S | H H    |
|                                                    |                                   | (2) AB 90            | AB 50 (7)                |                |                |     |        |
|                                                    |                                   | Rohstoffe/Fertig.    | Verbindl. a. L. u. L. g. |                |                |     |        |
| S H S H                                            | S H                               | S 1510 H             | S d. p. Bereich 3550 H   | S              | H S            | H S | H H    |
|                                                    |                                   | (3) AB 50            | AB 30 (8)                |                |                |     |        |
|                                                    |                                   | Gebührenfo. g. d. p. |                          |                |                |     |        |
|                                                    |                                   | S Bereich 1611 H     |                          |                |                |     |        |
|                                                    |                                   | (4) AB 80            |                          |                |                |     |        |
| <hr/>                                              |                                   |                      |                          |                |                |     |        |
| <hr/>                                              |                                   |                      |                          |                |                |     |        |
| <hr/>                                              |                                   |                      |                          |                |                |     |        |
| S Finanzrechnungskonto                             | H                                 |                      |                          |                |                |     |        |
| AB 50                                              |                                   |                      |                          |                |                |     |        |

in 1.000 Euro

## 7.2 Nichterfolgswirksame Buchungen im Drei-Komponenten-System

### 7.2.1 Der Kauf von Sachanlagen oder von Werkstoffen

In den Abschnitten 5.2.2 und 5.2.3 haben wir uns im Zwei-Komponenten-System mit dem Kauf von Sachanlagen und dem Kauf von Werkstoffen befasst. Bei den Buchungen haben wir einerseits danach unterschieden, ob der Kaufpreis sofort bezahlt wird oder ob zunächst ein Lieferantenkredit in Anspruch genommen wird, und andererseits danach, ob der Betrieb berechtigt ist, die Umsatzsteuer, die auch als Mehrwertsteuer bezeichnet wird, gegenüber dem Finanzamt geltend zu machen oder nicht.

Das NKF bzw. das Drei-Komponenten-System im Bereich der Kommunalverwaltung gilt für die so genannte „Kernverwaltung“ und damit für die Teile des kommunalen Verwaltungsbetriebs, die primär hoheitlich tätig sind. Die Erfüllung hoheitlicher Aufgaben ist nicht der Mehrwertsteuer unterworfen und insofern kann ein kommunaler Verwaltungsbetrieb die Mehrwertsteuer, die er zahlt, d.h. die Vorsteuer, in der Regel nicht beim Finanzamt geltend machen. **Die Mehrwertsteuer, die die Gemeinde zahlt, erhöht somit üblicherweise die Anschaffungskosten.**

**Nur dann, wenn die Gemeinde *ausnahmsweise* als Betrieb gewerblicher Art tätig wird, gilt dies nicht.** Die gezahlte Mehrwertsteuer, d.h. die Vorsteuer, kann der kommunale Verwaltungsbetrieb in diesen Fällen beim Finanzamt einfordern. Umgekehrt muss er, wenn er als Betrieb gewerblicher Art tätig wird, seine Verkaufspreise um die Mehrwertsteuer erhöhen und die empfangene Mehrwertsteuer dann an das Finanzamt abführen. Bei einem Betrieb gewerblicher Art handelt es sich nicht unbedingt um eine spezielle Organisationsform, sondern lediglich um ein Tätigkeitsfeld, das man aus steuerrechtlicher Sicht aus dem Tätigkeitsfeld des Betriebs „herausfiltert“. **Der kommunale Verwaltungsbetrieb unterscheidet sich bei dieser Betätigung nicht von einem privaten gewerblichen Unternehmen.** Die konkrete Abgrenzung des Betriebs kann in einzelnen Fällen Probleme aufwerfen. Grundsätzlich kann man im kommunalen Bereich von einem solchen Betrieb gewerblicher Art dann sprechen, wenn es sich um eine Einrichtung handelt, die einer nachhaltigen wirtschaftlichen Tätigkeit zur Erzielung von Einnahmen außerhalb der Land- und Forstwirtschaft dient und die sich innerhalb der Gesamtbetätigung der Gemeinde wirtschaftlich heraushebt.

**Nachfolgend gehen wir zunächst von dem Regelfall aus, dass die betreffenden Geschäfte den „hoheitlichen“ Bereich der Gemeinde betreffen.**

#### Beispiel 1:

Ein kommunaler Verwaltungsbetrieb kauft einen Büroschrank und nimmt einen Lieferantenkredit in Anspruch. Der Rechnungsbetrag in Höhe von 1.190 Euro beinhaltet die Mehrwertsteuer. Der Betrag wird drei Wochen später ohne Skontoabzug bezahlt.

Der Buchungssatz lautet

**Büro- und Geschäftsausstattung (0810)**  
**an**  
**Verbindlichkeiten aus Lieferungen und Leistungen gegen den**  
**privaten Bereich (3550) 1.190 Euro**

und kann folgendermaßen dargestellt werden (Angaben in Euro):

| Aktivkonto |             | Passivkonto |             |
|------------|-------------|-------------|-------------|
| S          | H           | S           | H           |
|            | <b>0810</b> |             | <b>3550</b> |
| 1190       |             |             | 1190        |

Bei der späteren Bezahlung gilt folgender Buchungssatz:

**Verbindlichkeiten aus Lieferungen und Leistungen gegen den**  
**privaten Bereich (3550)**  
**an**  
**Auszahlung aus dem Erwerb von beweglichen Sachen des Anlagevermögens**  
**oberhalb der Wertgrenze in Höhe von 410 Euro (7826) 1190 Euro**

Er kann folgendermaßen dargestellt werden (Angaben in Euro):

| Auszahlungskonto |             | Passivkonto |             |
|------------------|-------------|-------------|-------------|
| S                | H           | S           | H           |
|                  | <b>7826</b> |             | <b>3550</b> |
|                  | 1190        | 1190        |             |

### Beispiel 2:

Ein kommunaler Verwaltungsbetrieb kauft ein Bild zum Preis von 1.190 Euro. Der Betrag beinhaltet die Mehrwertsteuer und wird sofort bar bezahlt.

Der Buchungssatz lautet

**Kunstgegenstände (0610)**  
**an**  
**Auszahlung aus dem Erwerb von beweglichen Sachen des Anlagevermögens**  
**oberhalb der Wertgrenze in Höhe von 410 Euro (7826) 1190 Euro**

Er kann folgendermaßen dargestellt werden (Angaben in Euro):

| Auszahlungskonto |             | Aktivkonto |             |
|------------------|-------------|------------|-------------|
| S                | H           | S          | H           |
|                  | <b>7826</b> |            | <b>0610</b> |
|                  | 1190        | 1190       |             |

**Beispiel 3:**

Ein kommunaler Verwaltungsbetrieb kauft Büromaterial im Werte von 800 Euro zuzüglich 19 % Mehrwertsteuer. Das Büromaterial wird stets zunächst auf Lager genommen

Bei Lieferung bzw. Rechnungseingang lautet der Buchungssatz

**Sonstige Vorräte (1590)**

**an**

**Verbindlichkeiten aus Lieferungen und Leistungen gegen den  
privaten Bereich (3550) 952 Euro**

und kann folgendermaßen dargestellt werden (Angaben in Euro):

| Aktivkonto |      |   | Passivkonto |      |     |
|------------|------|---|-------------|------|-----|
| S          | 1590 | H | S           | 3550 | H   |
| 952        |      |   |             |      | 952 |

Bei der späteren Bezahlung gilt folgender Buchungssatz:

**Verbindlichkeiten aus Lieferungen und Leistungen gegen den  
privaten Bereich (3550)**

**an**

**Geschäftsauszahlungen Büromaterial (7431) 952 Euro**

Er kann folgendermaßen dargestellt werden (Angaben in Euro):

| Auszahlungskonto |      |     | Passivkonto |      |   |
|------------------|------|-----|-------------|------|---|
| S                | 7431 | H   | S           | 3550 | H |
|                  |      | 952 | 952         |      |   |

Betrachten wir nunmehr den **Ausnahmefall**, dass wir es innerhalb der Gemeindeverwaltung mit einem **Betrieb gewerblicher Art** zu tun haben, dann ergeben sich beispielsweise folgende Buchungen:

**Beispiel 1:**

Ein kommunaler Verwaltungsbetrieb kauft einen Büroschrank und nimmt einen Lieferantenkredit in Anspruch. Der Rechnungsbetrag in Höhe von 1190 Euro beinhaltet die Mehrwertsteuer (19%). Der Betrag wird drei Wochen später ohne Skontoabzug bezahlt.

Der Buchungssatz lautet

**Büro- und Geschäftsausstattung (0810) 1.000 Euro**  
**und**  
**Vorsteuer (1790) 190 Euro**  
**an**  
**Verbindlichkeiten aus Lieferungen und Leistungen gegen den**  
**privaten Bereich (3550) 1190 Euro**

und kann folgendermaßen dargestellt werden (Angaben in Euro):

| Aktivkonten |      |   | Passivkonto |      |      |
|-------------|------|---|-------------|------|------|
| S           | 0810 | H | S           | 3550 | H    |
| 1.000       |      |   |             |      | 1190 |
|             |      |   |             |      |      |
| S           | 1790 | H |             |      |      |
| 190         |      |   |             |      |      |

Bei der späteren Bezahlung gilt wieder der folgende Buchungssatz:

**Verbindlichkeiten aus Lieferungen und Leistungen gegen den**  
**privaten Bereich (3550)**  
**an**  
**Auszahlung aus dem Erwerb von beweglichen Sachen des Anlagevermögens**  
**oberhalb der Wertgrenze in Höhe von 410 Euro (7826) 1190 Euro**

Er kann folgendermaßen dargestellt werden (Angaben in Euro):

| Auszahlungskonto |      |      | Passivkonto |      |   |
|------------------|------|------|-------------|------|---|
| S                | 7826 | H    | S           | 3550 | H |
|                  |      | 1190 | 1190        |      |   |

### Beispiel 2:

Ein kommunaler Verwaltungsbetrieb kauft ein Bild zum Preis von 1.190 Euro. Der Betrag beinhaltet die Mehrwertsteuer in Höhe von 19% und wird sofort bar bezahlt.

Der Buchungssatz lautet

**Kunstgegenstände (0610) 1.000 Euro**  
**und**  
**Vorsteuer (1790) 190 Euro**  
**an**  
**Auszahlung aus dem Erwerb von beweglichen Sachen des Anlagevermögens ober-**  
**halb der Wertgrenze in Höhe von 410 Euro (7826) 1190 Euro**

Er kann folgendermaßen dargestellt werden (Angaben in Euro):

| Auszahlungskonto |      |      | Aktivkonten |      |   |
|------------------|------|------|-------------|------|---|
| S                | 7826 | H    | S           | 0610 | H |
|                  |      | 1190 | 1.000       |      |   |
|                  |      |      |             |      |   |
|                  |      |      | S           | 1790 | H |
|                  |      |      | 190         |      |   |

### Beispiel 3:

Ein kommunaler Verwaltungsbetrieb kauft Büromaterial im Werte von 800 Euro zuzüglich 19 % Mehrwertsteuer. Das Büromaterial wird stets zunächst auf Lager genommen

Bei Lieferung bzw. Rechnungseingang lautet der Buchungssatz

**Sonstige Vorräte (1590) 800 Euro**

**und**

**Vorsteuer (1790) 152 Euro**

**an**

**Verbindlichkeiten aus Lieferungen und Leistungen gegen den privaten Bereich (3550) 952 Euro**

und kann folgendermaßen dargestellt werden (Angaben in Euro):

| Aktivkonten |      |   | Passivkonto |      |     |
|-------------|------|---|-------------|------|-----|
| S           | 1590 | H | S           | 3550 | H   |
| 800         |      |   |             |      | 952 |
|             |      |   |             |      |     |
| S           | 1790 | H |             |      |     |
| 152         |      |   |             |      |     |

Bei der späteren Bezahlung gilt wieder folgender Buchungssatz:

**Verbindlichkeiten aus Lieferungen und Leistungen gegen den privaten Bereich (3550)**

**an**

**Geschäftsauszahlungen Büromaterial (7431) 952 Euro**

Er kann folgendermaßen dargestellt werden (Angaben in Euro):



| Auszahlungskonto |      |     | Passivkonto |      |   |
|------------------|------|-----|-------------|------|---|
| S                | 7431 | H   | S           | 3550 | H |
|                  |      | 952 | 952         |      |   |

### 7.2.2 Aufnahme und Tilgung eines Kredits

Im Kapitel 5.2.4. haben wir bereits grundsätzliche Aussagen zu diesem Thema gemacht. Im Drei-Komponenten-System ergeben sich demgegenüber nur geringe Abweichungen.

Wir erläutern dies nachfolgend am Beispiel eines **reinen** Kreditgeschäfts. Unterstellen also zunächst aus Gründen der Vereinfachung, dass keine Zinsen zu zahlen sind. Eine Kreditaufnahme, die, wie dies die Regel ist, mit Zinszahlungen in Verbindung steht, wird an späterer Stelle behandelt.

#### Beispiel:

Ein kommunaler Verwaltungsbetrieb nimmt für ein Bauvorhaben bei einer privatwirtschaftlichen Bank einen langfristigen Kredit in Höhe von 100.000 Euro auf und lässt sich den Betrag auf das Girokonto überweisen. Der Kredit ist, auf 10 Jahre verteilt, in gleich hohen Raten zu tilgen.

- Der Buchungssatz bei der Kreditaufnahme lautet

**Kreditaufnahme für Investitionen/Einzahlungen aus Krediten  
von privaten Unternehmen (6917)**

an

**Investitionskredite von Banken und Kreditinstituten (3251) 100.000 Euro**

und kann folgendermaßen dargestellt werden (Angaben in Euro):

| Einzahlungskonto |      |   | Passivkonto |      |         |
|------------------|------|---|-------------|------|---------|
| S                | 6917 | H | S           | 3251 | H       |
| 100.000          |      |   |             |      | 100.000 |

- Für die einzelne jährliche Tilgung gilt der Buchungssatz

**Investitionskredite von Banken und Kreditinstituten (3251)**

an

**Tilgung von Krediten von privaten Unternehmen (7917) 10.000 Euro**

und die folgende Darstellung (Angaben in Euro):

| Auszahlungskonto |      |        | Passivkonto |      |   |
|------------------|------|--------|-------------|------|---|
| S                | 7917 | H      | S           | 3251 | H |
|                  |      | 10.000 | 10.000      |      |   |

### 7.2.3 Empfangene Investitionszuschüsse

Erhält ein kommunaler Teilbetrieb bei Investitionen Zuschüsse oder Zuweisungen von anderen öffentlichen Verwaltungsbetrieben, also beispielsweise vom Land, so ist der Zugang der finanziellen Mittel auf einem Einzahlungskonto zu erfassen. Das Gleiche gilt für freiwillige Zuschüsse von privaten Unternehmen und Beiträge. Bei den **Beiträgen** handelt es sich um Zuschüsse, zu denen die privaten Haushalte und Unternehmen unter bestimmten Umständen verpflichtet sind. Zu nennen sind hier beispielsweise Anschlussbeiträge. Da es sich bei einem empfangenen Zuschuss um eine Erfolgseinnahme handelt, d.h. um eine Einzahlung, die letztlich zu einer Erhöhung des Reinvermögens führt, müsste die Gegenbuchung an sich auf einem Ertragskonto erfolgen.

Von dieser Vorgehensweise weicht man jedoch im kommunalen Bereich ab. Man will vermeiden, dass durch die Investitionshilfe ein Ertrag und damit letztlich ein Gewinnbeitrag entsteht, durch den das Jahresergebnis eines kommunalen Verwaltungsbetriebs verbessert wird. Eine Kommune müsste sich dann eventuell nicht mehr anstrengen, den neuen Haushaltsausgleich aus eigener Kraft zu erreichen.

Um also zu verhindern, dass die Städte, Kreise und Gemeinden durch solche Investitionshilfen ihr Jahresergebnis verbessern können, wird für die Gegenbuchung ein **spezielles Passivkonto** herangezogen **und in der Bilanz eine spezielle Passivposition, der Sonderposten**, ausgewiesen. Der Sonderposten ist an sich ein Fremdkörper in der Bilanz. Er kann weder eindeutig dem Eigenkapital noch dem Fremdkapital zugeordnet werden. Insofern ist die Bezeichnung „Sonderposten“ absolut zutreffend. Deshalb wird diese Passivposition in der Bilanz auch zwischen den beiden Kapitalblöcken, d.h. zwischen dem Eigen- und dem Fremdkapital, ausgewiesen.

Wie wir später noch zeigen werden, kann man die erhaltene Zuwendung in der Regel nicht auf Dauer im Sonderposten „parken“. Der Sonderposten ist üblicherweise ertragswirksam aufzulösen, und zwar parallel zur Abschreibung des mit dem Zuschuss finanzierten Wirtschaftsgutes. Insofern wird nicht verhindert, dass eine Investitionshilfe zu einem Ertrag führt, sondern der dadurch hervorgerufene Ertrag wird mit Hilfe des Sonderpostens lediglich über die Laufzeit des Wirtschaftsgutes verteilt. Da dem Ertrag, der jährlich durch die anteilige Auflösung des Sonderpostens hervorgerufen wird, jeweils die Abschreibung des Wirtschaftsgutes gegenübersteht, kann der durch den Zuschuss entstehende Ertrag nicht auf das jeweilige Jahresergebnis „durchschlagen“. Die Gemeinde muss folglich letztlich den „neuen“ Haushaltsausgleich aus eigener Kraft herstellen.

#### Beispiel 1 (hoheitlicher Bereich):

Ein kommunaler Verwaltungsbetrieb erhält für ein bereits angeschafftes neues Feuerwehrfahrzeug eine zuvor noch nicht bewilligte Investitionshilfe vom Land. Der Anschaffungswert für das Fahrzeug betrug 400.000 Euro und das Land fördert diese Investition nachträglich mit 200.000 Euro. Es wird unterstellt, dass es hierfür die entsprechenden rechtlichen Voraussetzungen gibt.

Beim Erhalt des zuvor noch nicht bewilligten Zuweisungsbetrages gilt der Buchungssatz

**Investitionszuweisungen vom Land (6811)**

**an**

**Sonderposten aus Zuweisungen vom Land (2311) 200.000 Euro**

und die folgende Darstellung (Angaben in Euro)

| Einzahlungskonto |      |   | Passivkonto |      |         |
|------------------|------|---|-------------|------|---------|
| S                | 6811 | H | S           | 2311 | H       |
| 200.000          |      |   |             |      | 200.000 |

**Beispiel 2 (hoheitlicher Bereich):**

Ein kommunaler Verwaltungsbetrieb versendet, nachdem er ein Baugebiet erschlossen hat, an einen Grundstückseigentümer für einen Kanalanschluss den entsprechend Beitragsbescheid in Höhe von 2.000 Euro. 14 Tage später geht der betreffende Betrag ein.

Beim Versenden des Beitragsbescheides gilt folgender Buchungssatz:

**Beitragsforderungen gegenüber dem privaten Bereich (1621)**

**an**

**Sonderposten aus Beiträgen für Kanalanschlüsse (2320) 2.000 Euro**

und die folgende Darstellung (Angaben in Euro)

| Aktivkonto |      |   | Passivkonto |      |       |
|------------|------|---|-------------|------|-------|
| S          | 1621 | H | S           | 2320 | H     |
| 2.000      |      |   |             |      | 2.000 |

Beim Erhalt des Betrages gilt der Buchungssatz

**Beiträge für Kanalanschlüsse (6831)**

**an**

**Beitragsforderungen gegenüber dem privaten Bereich (1621) 2.000 Euro**

und die folgende Darstellung (Angaben in Euro)

| Einzahlungskonto |      |   | Aktivkonto |      |       |
|------------------|------|---|------------|------|-------|
| S                | 6831 | H | S          | 1621 | H     |
| 2.000            |      |   |            |      | 2.000 |

**Beispiel 3 (hoheitlicher Bereich):**

Ein kommunaler Verwaltungsbetrieb erhält per Banküberweisung für einen zu erstellenden Kanalanschluss von einem privaten Haushalt eine Anzahlung (Beitragsvorauszahlung) in Höhe von 1160 Euro. Nach Erstellung des Anschlusses wird dem privaten Haushalt die restliche Beitragszahlung in Höhe von 840 in Rechnung gestellt.

Zunächst gilt der folgende Buchungssatz

**Beiträge für Kanalanschlüsse (6831)**

**an**

**Erhaltene Anzahlungen (3740) 1160 Euro**

und die folgende Darstellung (Angaben in Euro):

| Einzahlungskonto |      |   | Passivkonto |      |      |
|------------------|------|---|-------------|------|------|
| S                | 6831 | H | S           | 3740 | H    |
| 1160             |      |   |             |      | 1160 |

Beim Ausgang der Schlussrechnung gilt folgende Buchung

**Beitragsforderungen gegenüber dem privaten Bereich (1621) 840 Euro**

**und**

**Erhaltene Anzahlungen (3740) 1160 Euro**

**an**

**Sonderposten aus Beiträgen für Kanalanschlüsse (2320) 2.000 Euro**

und die folgende Darstellung (Angaben in Euro)

| Aktivkonto |      |   | Passivkonten |      |       |
|------------|------|---|--------------|------|-------|
| S          | 1621 | H | S            | 2320 | H     |
| 840        |      |   |              |      | 2.000 |

  

| S    | 3740 | H |
|------|------|---|
| 1160 |      |   |

Beim Erhalt des restlichen Betrages gilt der Buchungssatz

**Beiträge für Kanalanschlüsse (6831)**

**an**

**Beitragsforderungen gegenüber dem privaten Bereich (1621) 840 Euro**

und die folgende Darstellung (Angaben in Euro)

| Einzahlungskonto |      |   | Aktivkonto |      |     |
|------------------|------|---|------------|------|-----|
| S                | 6831 | H | S          | 1621 | H   |
| 840              |      |   |            |      | 840 |

**Beispiel 4 (hoheitlicher Bereich):**

Ein kommunaler Verwaltungsbetrieb erhält per Banküberweisung für die Anschaffung eines Spezialfahrzeuges vom Land 50.000 Euro. Erst 4 Wochen später wird das betreffende Fahrzeug auf Ziel gekauft. Der Anschaffungswert beträgt 100.000 Euro.

Da das Wirtschaftsgut, für das die Gemeinde die Zuwendung erhalten hat, noch nicht vorhanden ist, kann zunächst kein Sonderposten gebildet werden. Solange die Gemeinde das betreffende Wirtschaftsgut, für das die Zuwendung des Landes gilt, noch nicht angeschafft wurde, besteht eine Verbindlichkeit gegenüber dem Land. Wird der Betrag nicht für den vorgesehenen Verwendungszweck eingesetzt, muss er an das Land zurücküberwiesen werden.

Damit gilt beim Erhalt des Geldes folgender Buchungssatz:

**Investitionszuweisungen vom Land (6811)**  
**an**

**Verbindlichkeiten aus Transferleistungen gegenüber dem Land (3640) 50.000 Euro**

und die folgende Darstellung (Angaben in Euro)

| Einzahlungskonto |      |   | Passivkonto |      |        |
|------------------|------|---|-------------|------|--------|
| S                | 6811 | H | S           | 3640 | H      |
| 50.000           |      |   |             |      | 50.000 |

Beim Kauf des Fahrzeuges erfolgt dann die Umbuchung auf den Sonderposten und es gelten die folgenden Buchungssätze

- (1) **Fahrzeuge (0750) 100.000 Euro**  
**an**  
**Verbindlichkeiten aus Lieferung und Leistung gegen den privaten Bereich (3550) 100.000 Euro**
- (2) **Verbindlichkeiten aus Transferleistungen gegenüber dem Land (3640) 50.000 Euro**  
**an**  
**Sonderposten aus Zuweisungen vom Land (2311) 50.000 Euro**

und die folgende Darstellung (Angaben in Euro)

| Aktivkonto  |      |   |
|-------------|------|---|
| S           | 0750 | H |
| (1.)100.000 |      |   |

| Passivkonten |         |      |
|--------------|---------|------|
| S            | 3550    | H    |
|              | 100.000 | (1.) |

| S          | 3640 | H |
|------------|------|---|
| (2.)50.000 |      |   |

| S | 2311   | H    |
|---|--------|------|
|   | 50.000 | (2.) |

Wie bereits erwähnt, schließen sich an die soeben erläuterten nicht-erfolgswirksamen Buchungen erfolgswirksame Buchungen an, auf die noch eingegangen wird.

## 7.3 Erfolgswirksame Buchungen im Drei-Komponenten-System

### 7.3.1 Die Verbuchung des Personalaufwandes

Im Abschnitt 5.3.2. haben wir die grundsätzliche Vorgehensweise bei der Verbuchung des Personalaufwandes bereits erläutert. Wir können uns daher jetzt darauf beschränken, die Beispiele unter Einsatz des NKF- Kontenplans zu buchen.

#### Beispiel:

Das Bruttogehalt für einen Mitarbeiter betrage 3.000 Euro, es wird weiterhin unterstellt, dass davon auf den Arbeitnehmeranteil zur Sozialversicherung 400 Euro sowie auf die Lohn- und Kirchensteuer 600 Euro entfallen. Zusätzlich muss der Arbeitgeber noch seinen Anteil zur Sozialversicherung in Höhe von 400 Euro entrichten. Das Nettogehalt wird pünktlich überwiesen, die anderen Zahlungen werden später vorgenommen.

Der Buchungssatz bei Auszahlung der Gehälter lautet somit

**Personalaufwendungen/Vergütungen der Angestellten (5012) 3.000 Euro**  
**und**  
**Personalaufwendungen/Beiträge zur gesetzlichen Sozialversicherung**  
**für Angestellte (5032) 400 Euro**  
**an**  
**Personalauszahlungen/Vergütungen der Angestellten (7012) 2.000 Euro**  
**und**
